# Supplementary material for: New synthetic strategy toward a natural enzyme–nanozyme hybrid dual-function nanomotor and its application in environmental remediation
Source: Royal Society of Chemistry journal article supplement (doi:10.1039/d3cy01420g), 2024-01-01
Supplement: d3cy01420g1.pdf [file d3cy01420g1.pdf]

## **ELECTRONIC SUPPLEMENTARY INFORMATION**

### **New synthetic strategy toward natural enzymes-nanozymes hybrid dual-function nanomotor and its application in environmental remediation**

Suo Gao, Chenzhang Liu, Xiaohan Yang, Ziwei Lan, Min Zuo, Ping Yang, Jia Li<sup>1</sup>

*School of Material Science and Engineering, University of Jinan, Jinan, China*

---

<sup>1</sup> E-mail address: mse\_lij@ujn.edu.cn (Jia Li).

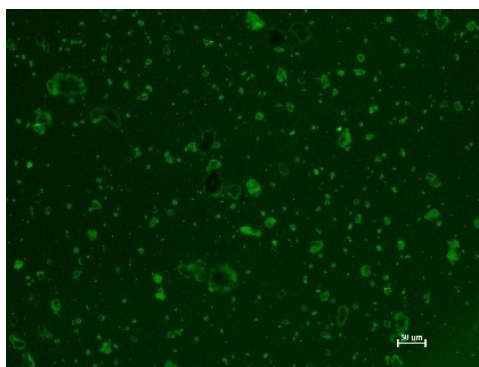

**Fig. S1** CLSM images of Lac/Fe-BTC@NiFe-LDH@MnO<sub>2</sub>/HNTs micromotors after labeling with FITC

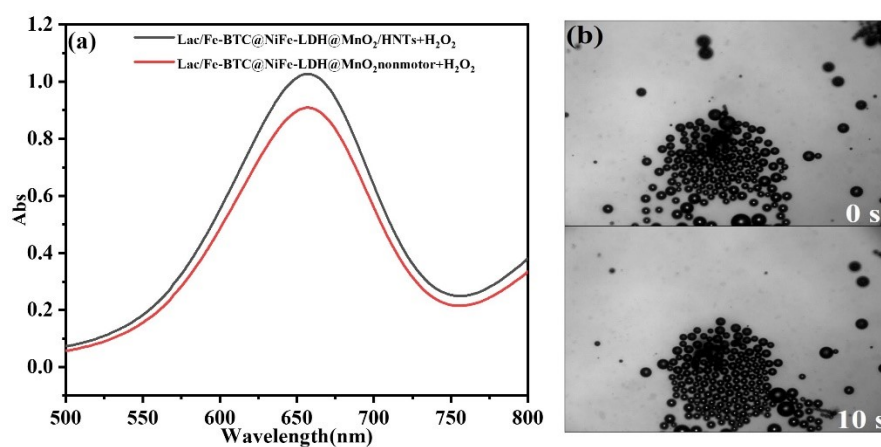

**Fig. S2** UV-visible absorption spectrum of different states of motion (a), time-lapse motion images of Lac/Fe-BTC@NiFe-LDH@MnO<sub>2</sub> non-motor in 3% H<sub>2</sub>O<sub>2</sub> at 0 s and 10 s (b)

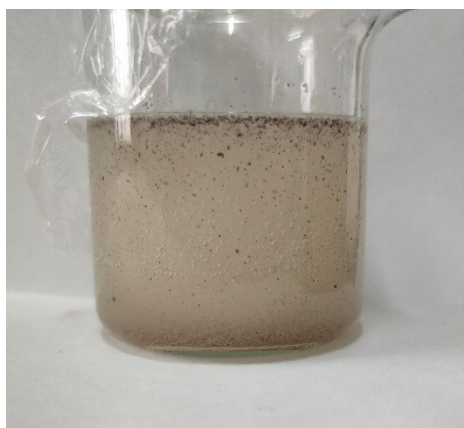

**Fig. S3** Photographs of nanomotors during degradation

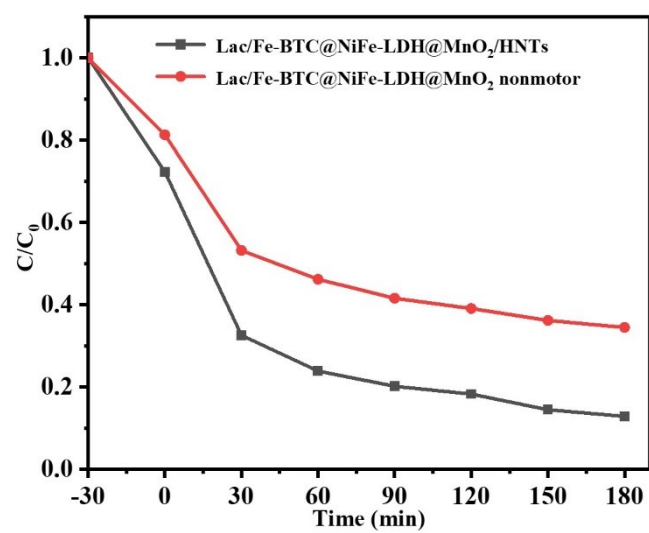

Fig. S4 Degradation rate of different states of motion.
